# Supplementary material for: Systematic Study on Nonlinear Optical Chromophores with Improved Electro-Optic Activity by Introducing 3,5-Bis(trifluoromethyl)benzene Derivative Isolation Groups into the Bridge
Source: MDPI journal article supplement (doi:10.3390/molecules28020488), 2023-01-04
Supplement: s1 [file s1]

# Supporting Information

## Systematic Study on Nonlinear Optical Chromophores with Improved Electro-Optic Activity by Introducing 3,5-Bis(Trifluoromethyl)Benzene Derivative Isolation Groups into the Bridge

Tongtong Liu <sup>1,2</sup>, Fuyang Huo <sup>3,\*</sup>, Changqing Ge <sup>1,2</sup>, Ya Li <sup>1,2</sup>, Jing He <sup>1,2</sup>, Han Zheng <sup>1,2</sup>, Qian He <sup>1,2</sup>, Yinsen Zhao <sup>1,2</sup>, Zhuo Chen<sup>3,\*</sup> and Shuhui Bo <sup>1,2\*</sup>

1 Optoelectronics Research Centre, School of Science, Minzu University of China, Beijing 100081, China

2 Engineering Research Centre of Photonic Design Software, Ministry of Education, Beijing 100081, China

3 Key laboratory of Bio-inspired Materials and Interfacial Science, Technical Institute of Physics and Chemistry, Chinese Academy of Sciences, Beijing 100190, China

**Table S1.** The values of glass transition temperature ( $T_g$ ) and contact poling temperature ( $T_p$ ) of the chromophore doped APC

| Chromophore   | A   | B   | C   | D   |
|---------------|-----|-----|-----|-----|
| $T_g$ (15wt%) | 154 | 147 | 149 | 148 |
| $T_p$ (15wt%) | 155 | 150 | 152 | 149 |
| $T_g$ (25wt%) | 135 | 129 | 131 | 133 |
| $T_p$ (25wt%) | 137 | 131 | 134 | 135 |
| $T_g$ (35wt%) | 130 | 128 | 127 | 129 |
| $T_p$ (35wt%) | 134 | 129 | 134 | 133 |

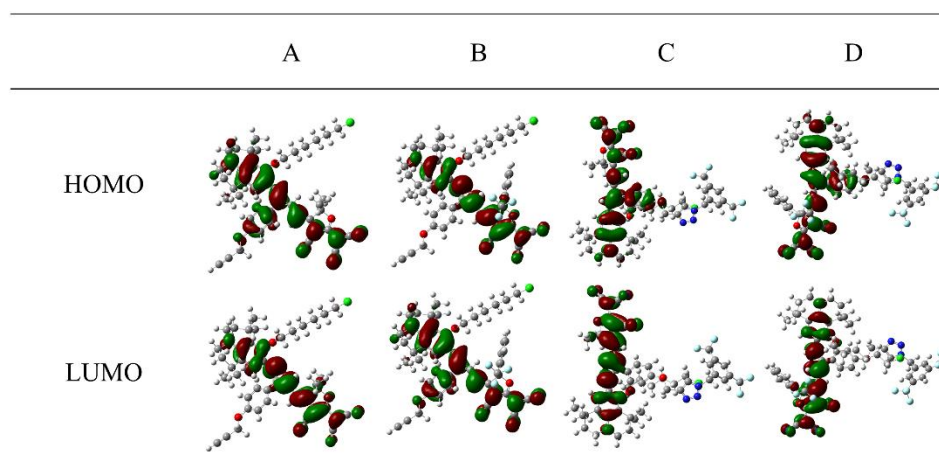

**Figure S1.** The frontier molecular orbitals of chromophores A, B, C and D.

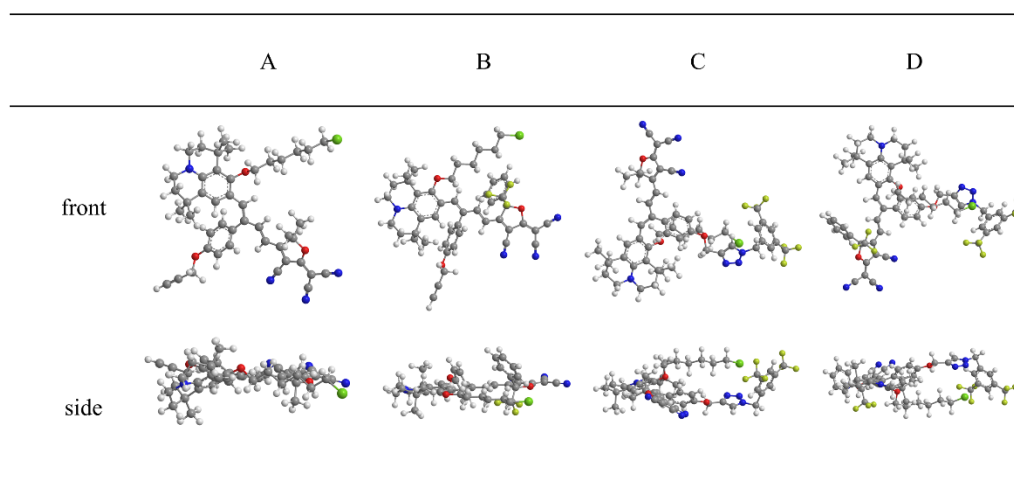

**Figure S2.** The optimized structures of chromophores A, B, C, D.

# Compound 6:

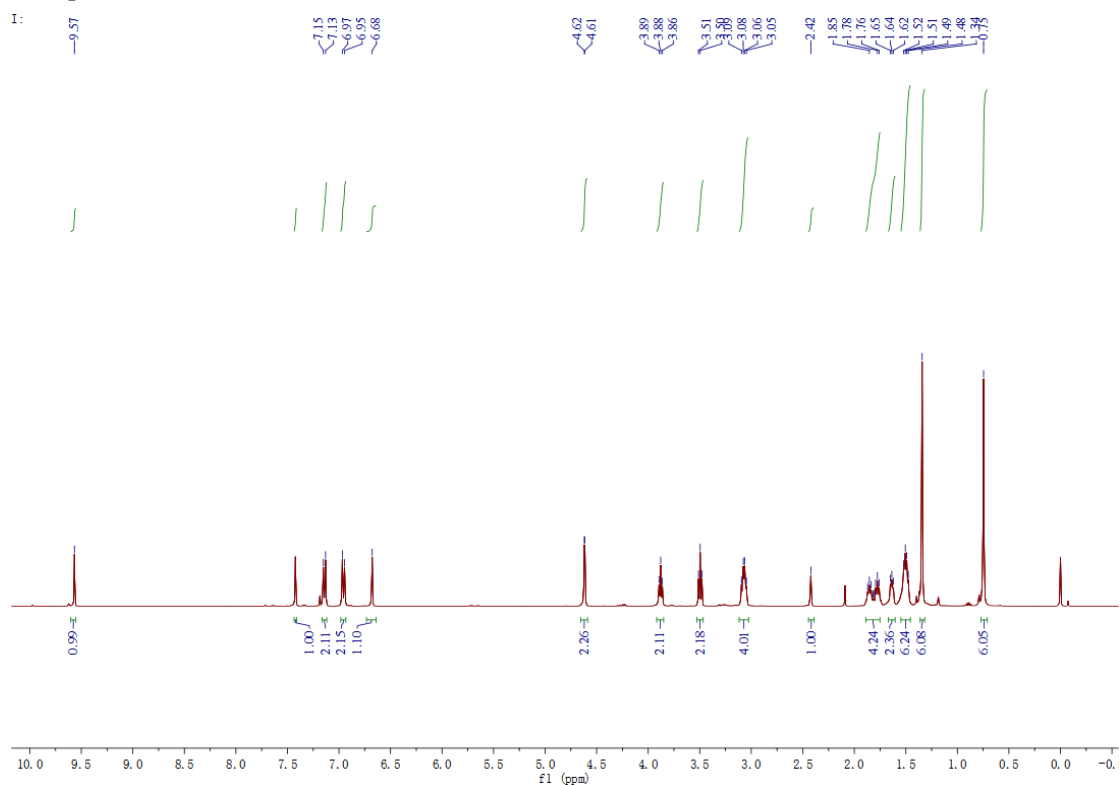

# Compound 8:

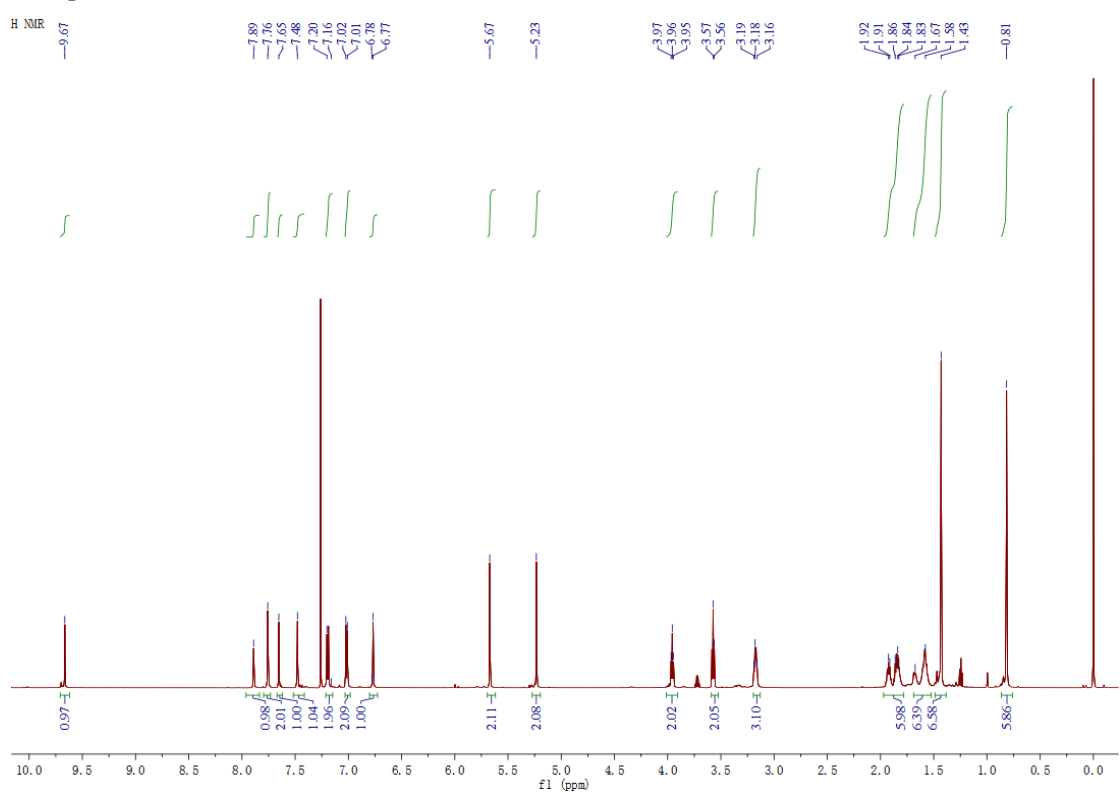

Figure S3. The <sup>1</sup>H NMR spectra of the compound 6 and compound 8.

# Chromophore A:

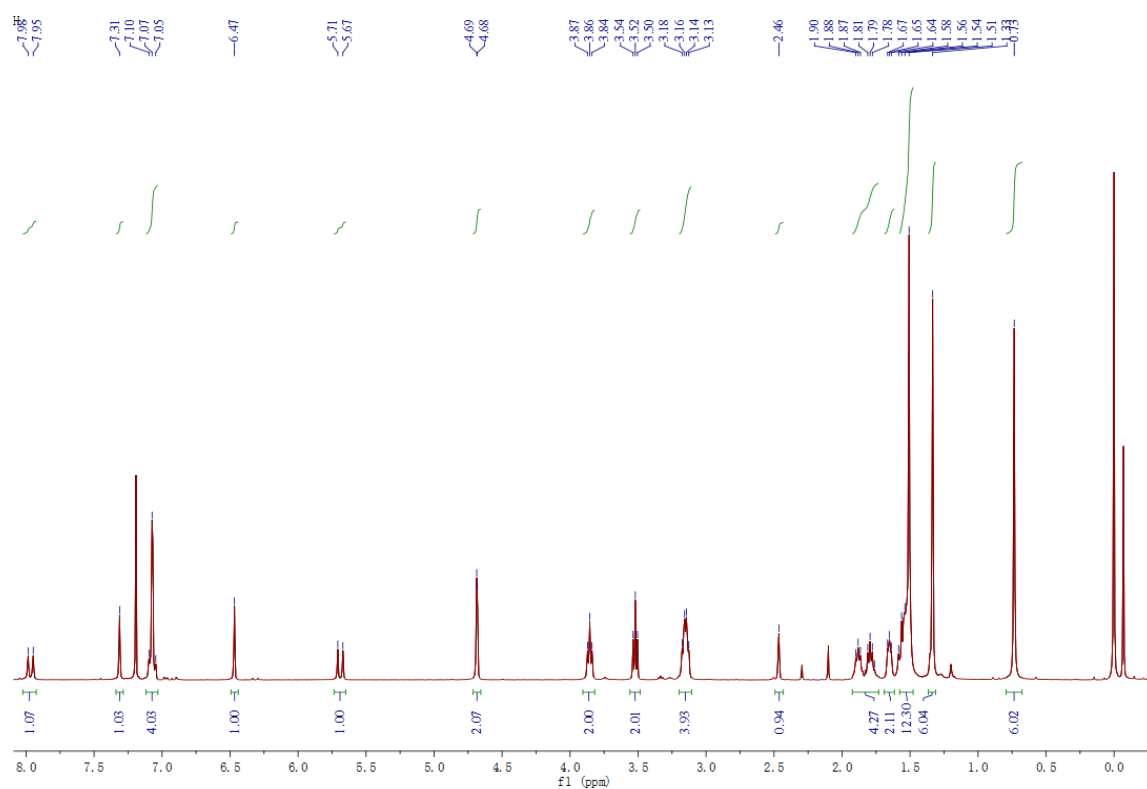

# Chromophore B:

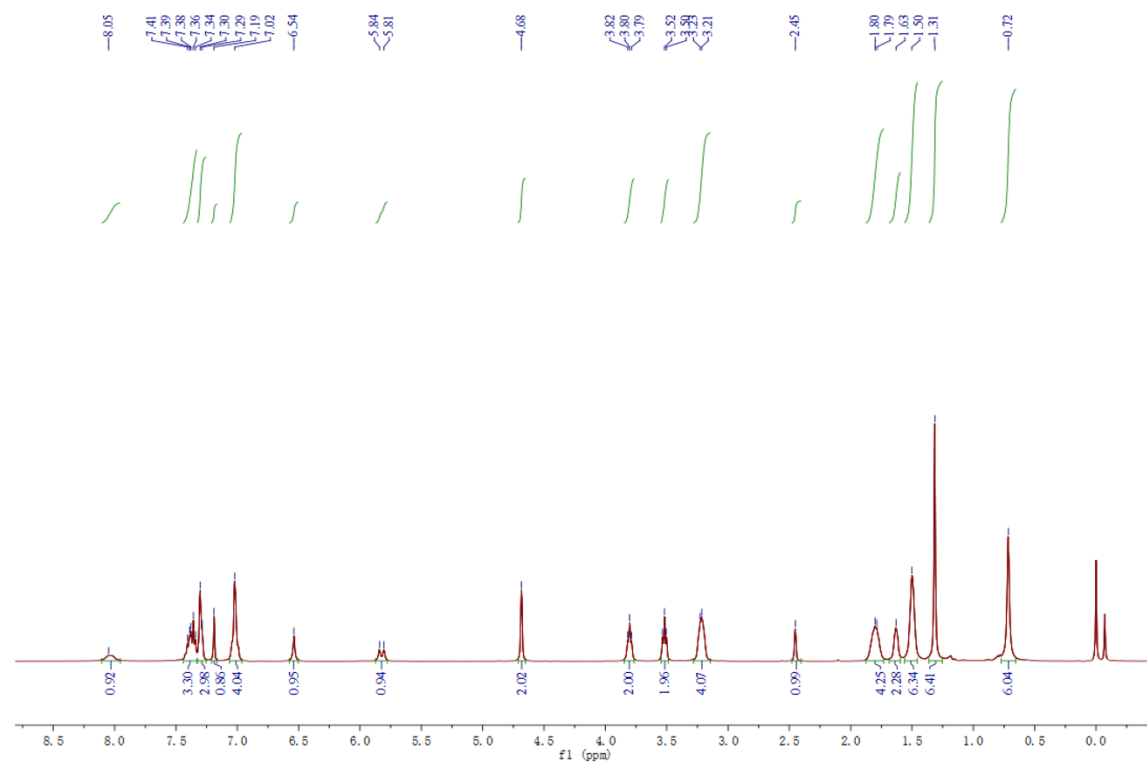

### Chromophore C:

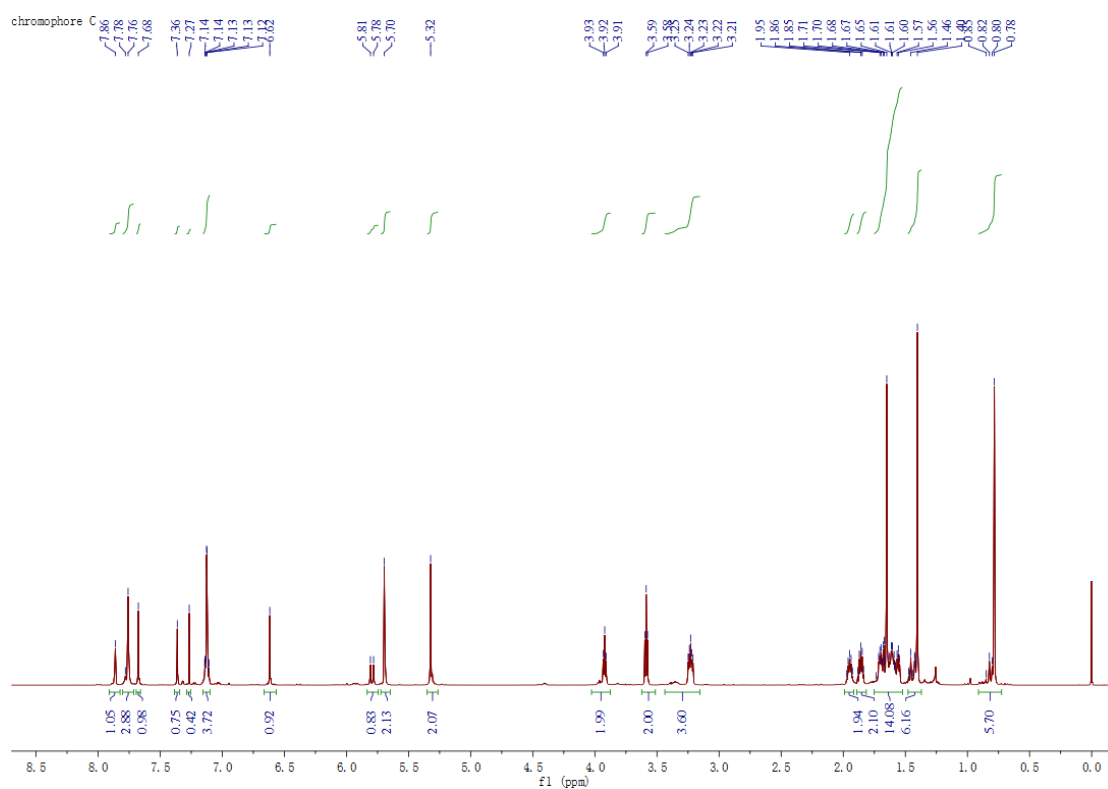

### Chromophore D:

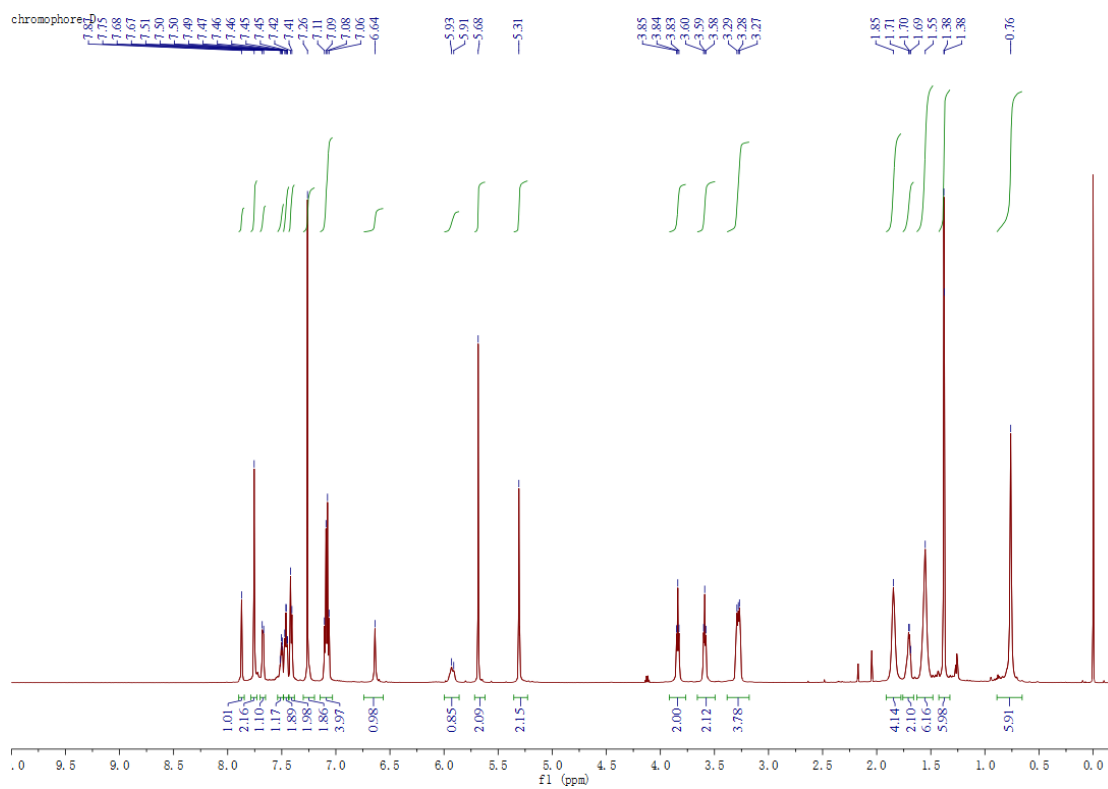

**Figure S4.** The  $^1\text{H}$  NMR spectra of the chromophore A, B, C and D.

Compound 6:

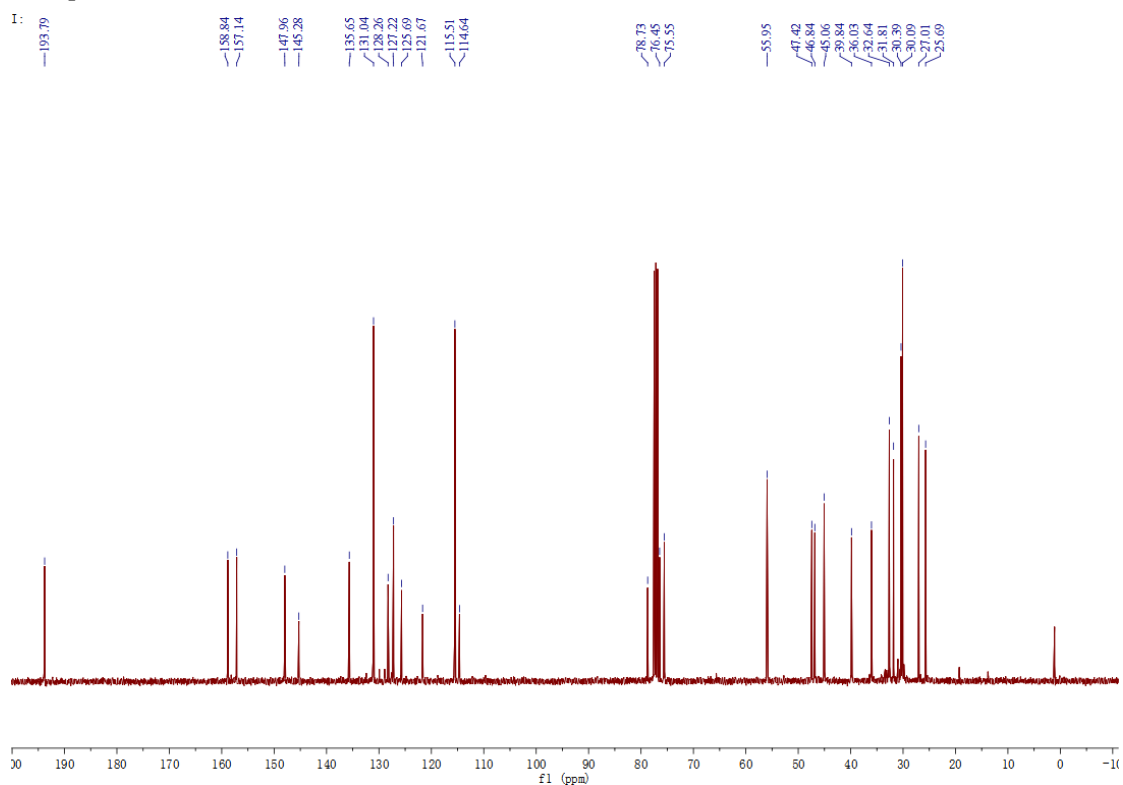

Compound 8:

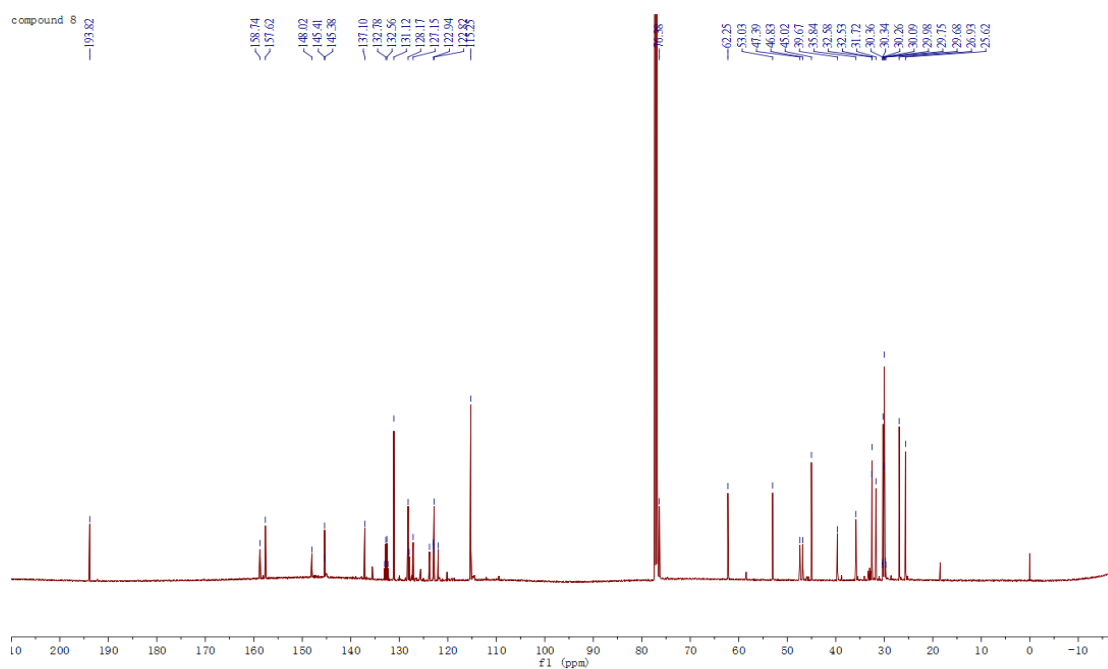

Figure S5. The <sup>13</sup>C NMR spectra of the compound 6 and compound 8.

### Chromophore A:

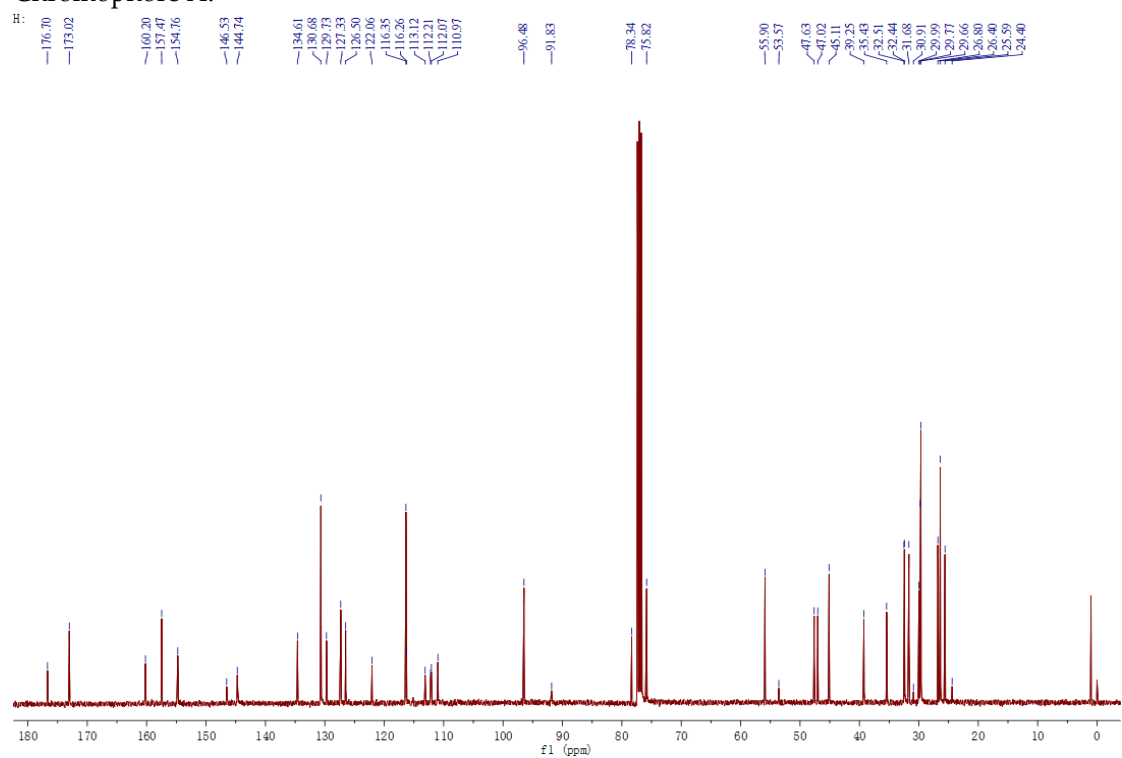

### Chromophore B:

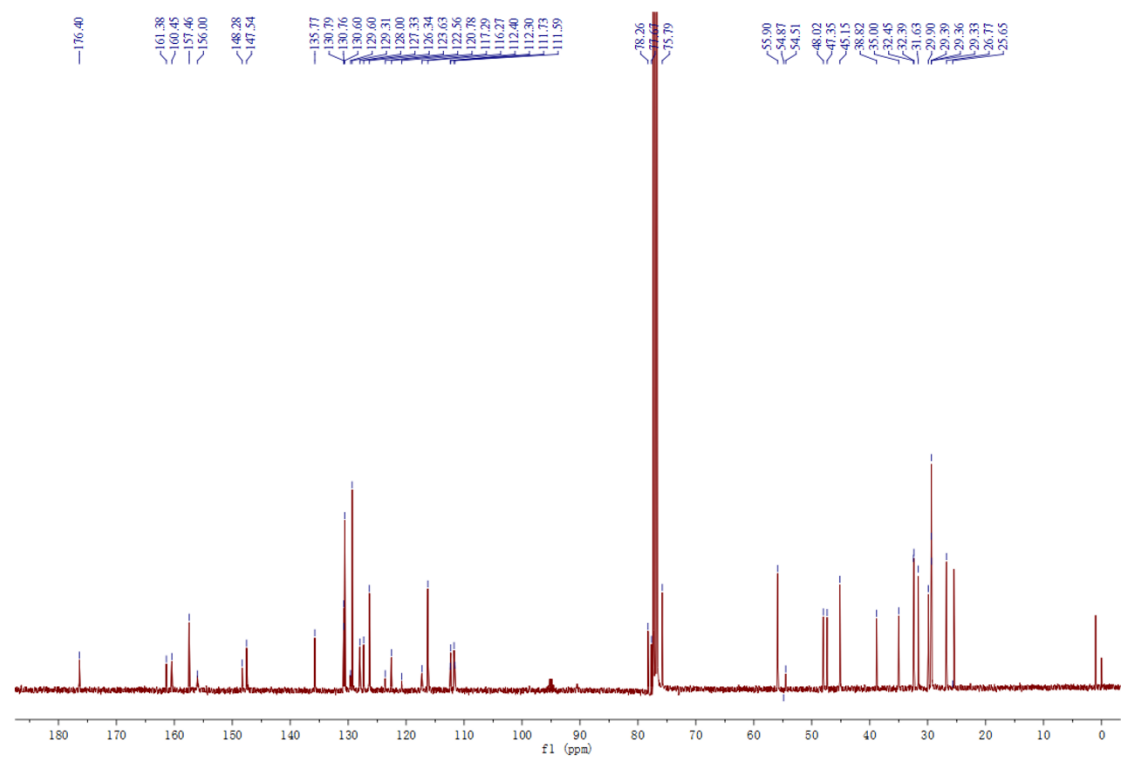

### Chromophore C:

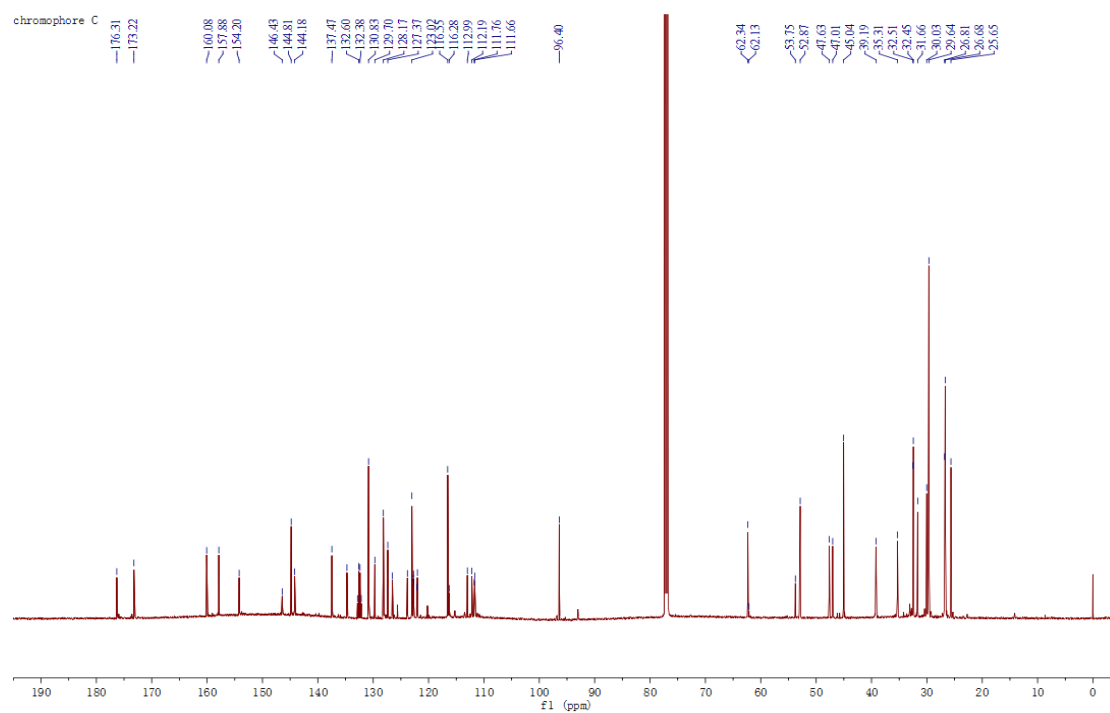

# Chromophore D:

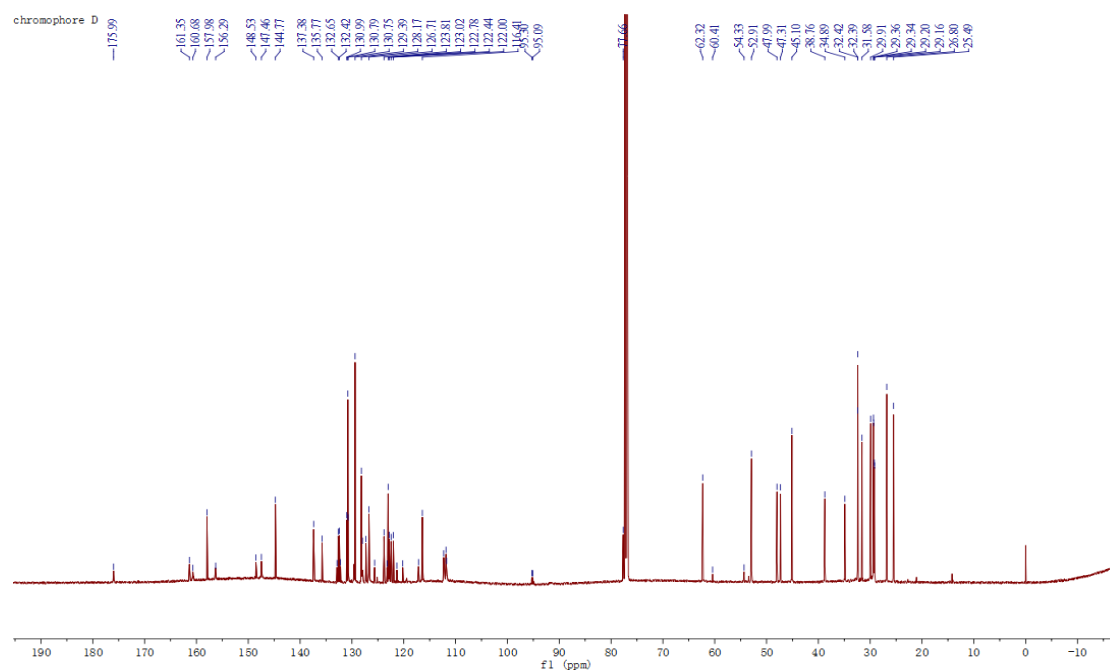

**Figure S6.** The  $^{13}\text{C}$  NMR spectra of the chromophore A, B, C and D.

Compound 8:



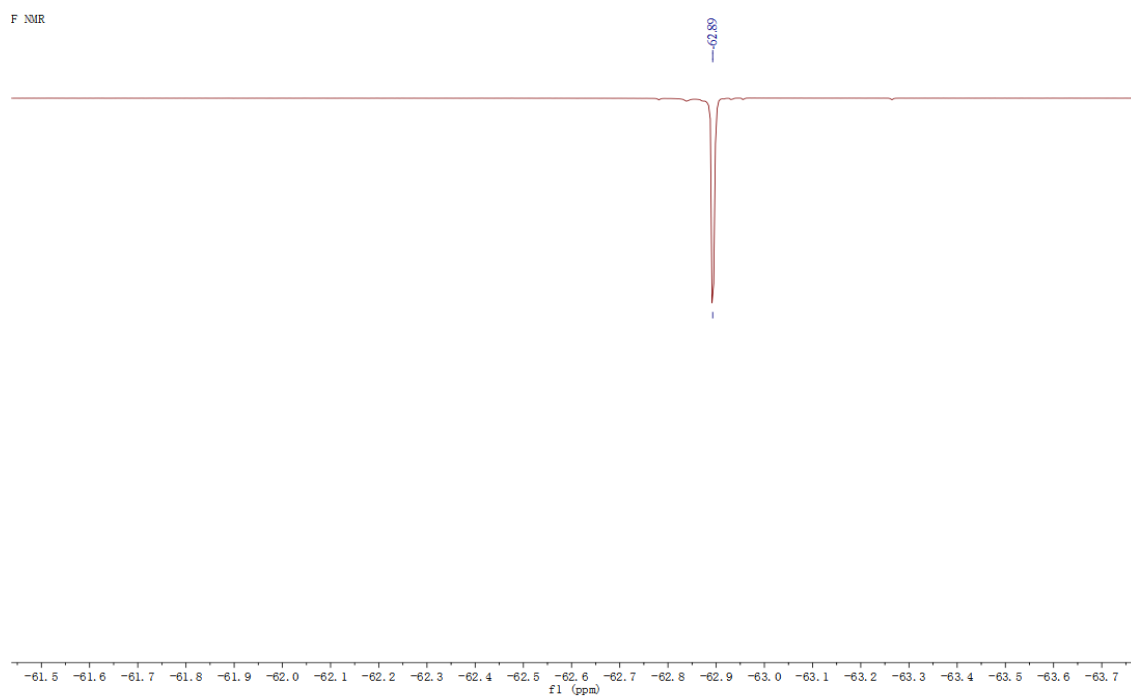

**Figure S7.** The  $^{19}\text{F}$  NMR spectra of the compound 8

### Chromophore C:

<sup>19</sup>F NMR

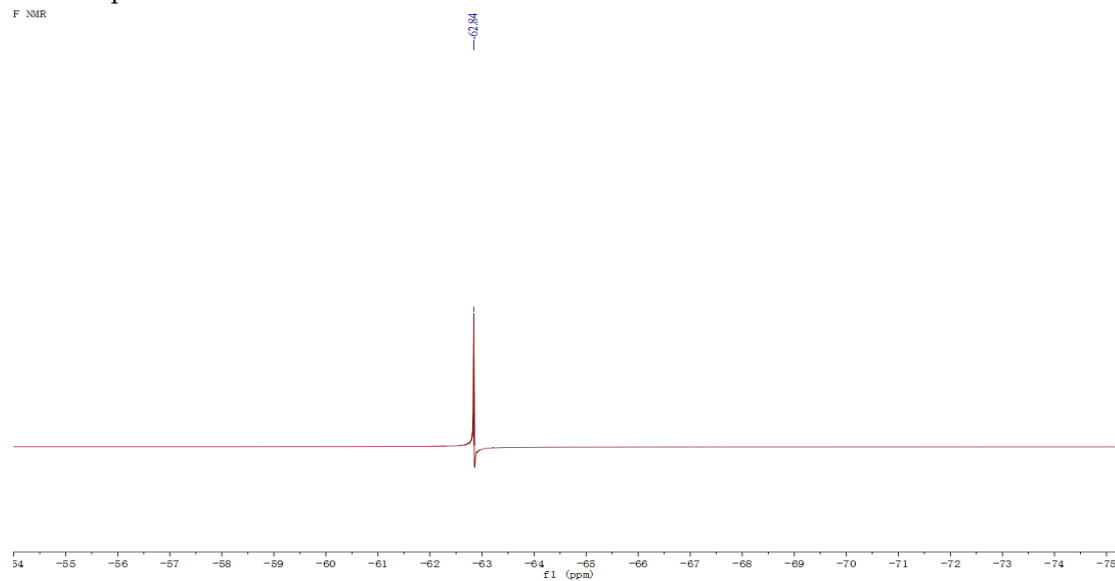

### Chromophore D:

chromophore D

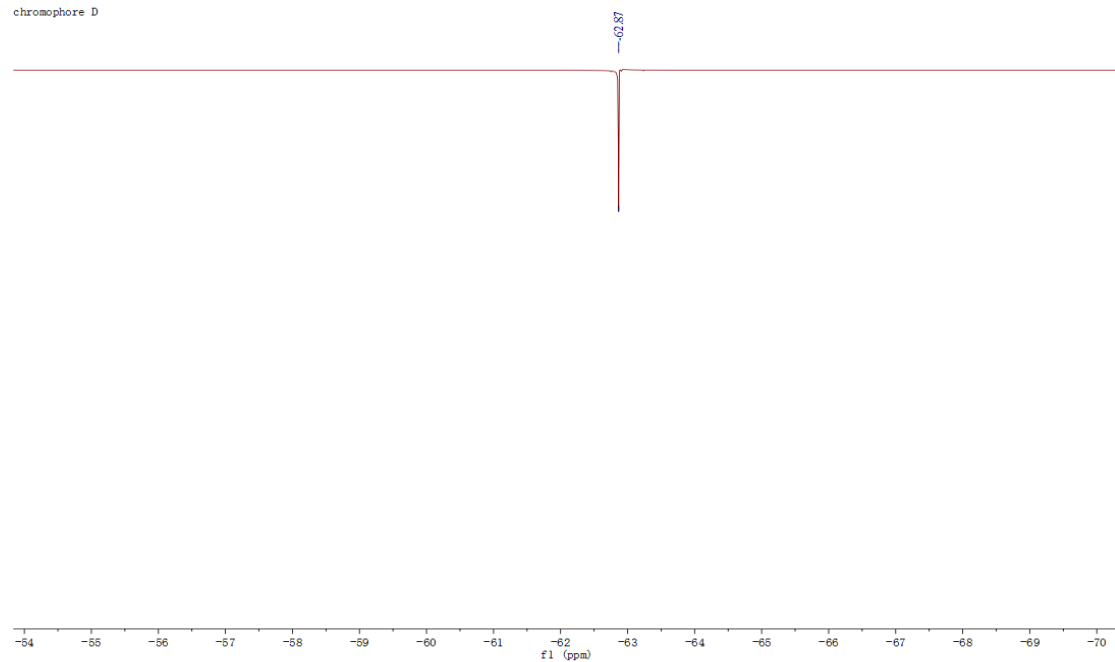

**Figure S8.** The <sup>19</sup>F NMR spectra of the chromophore C and D.

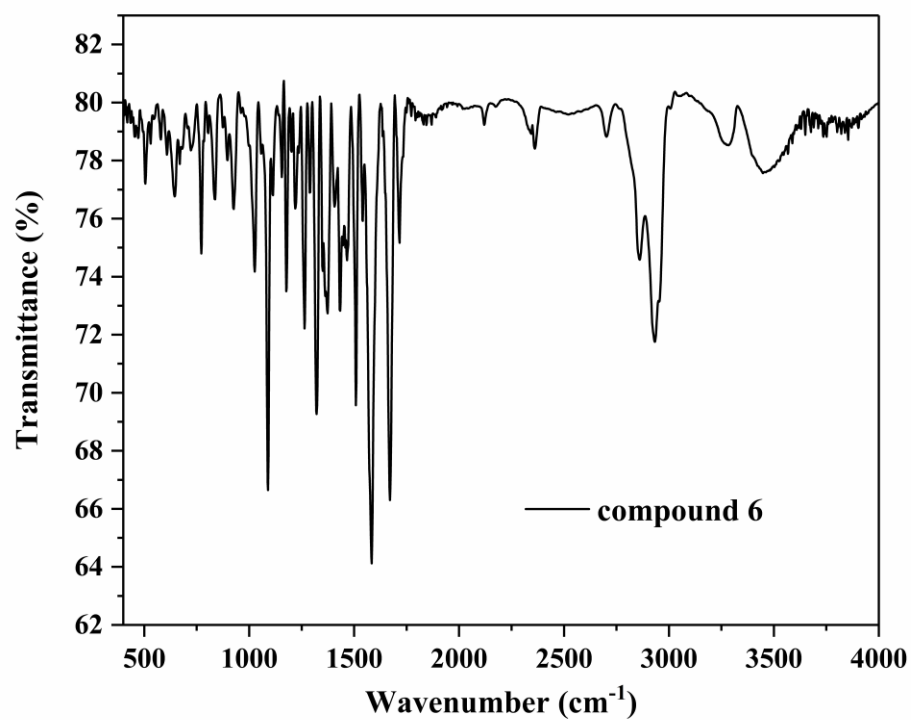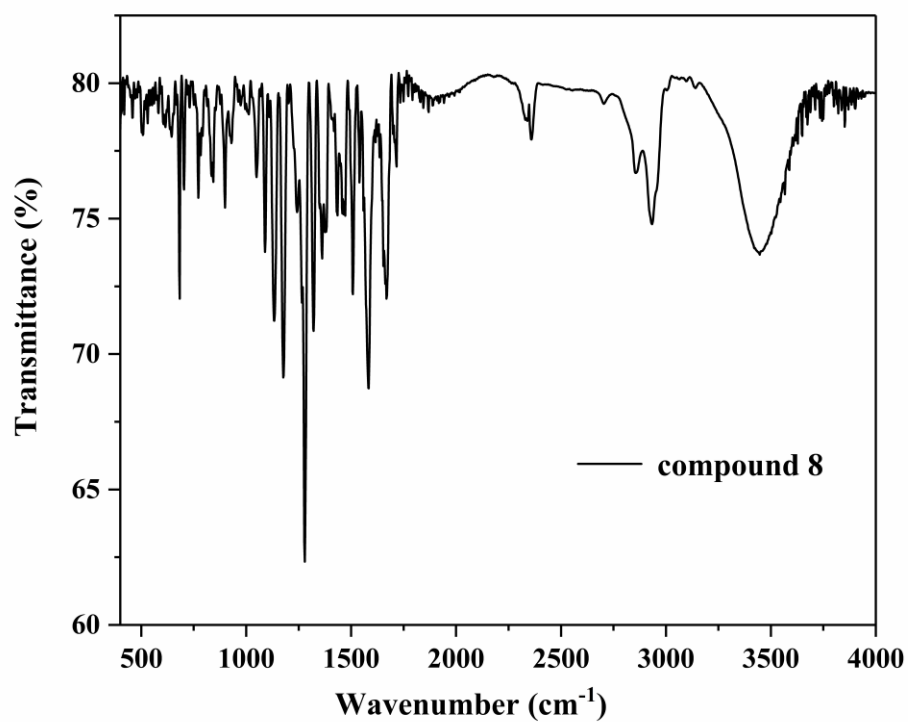

Figure S9. The FTIR spectra of the compound 6 and compound 8.

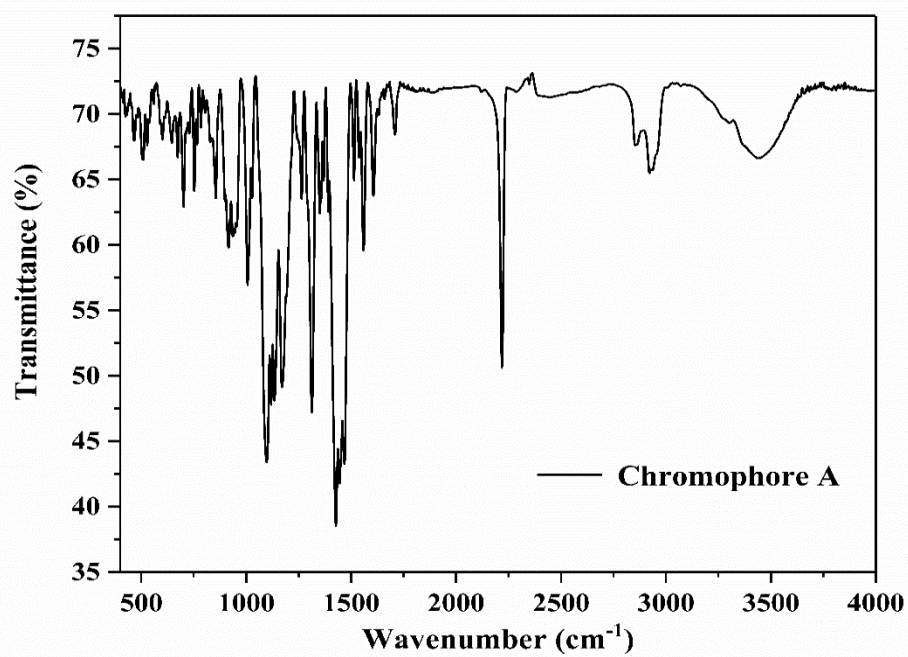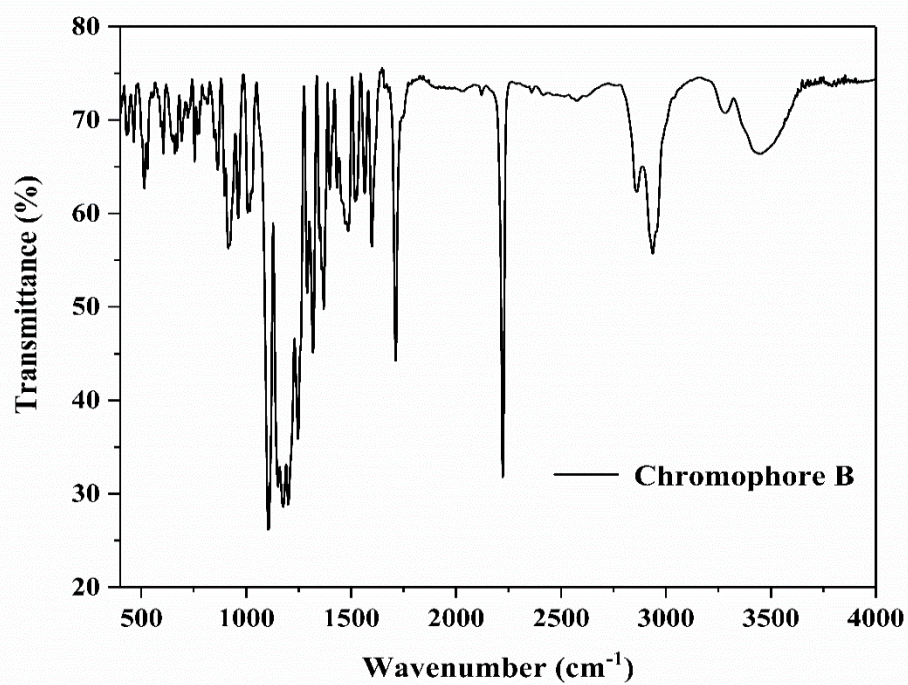

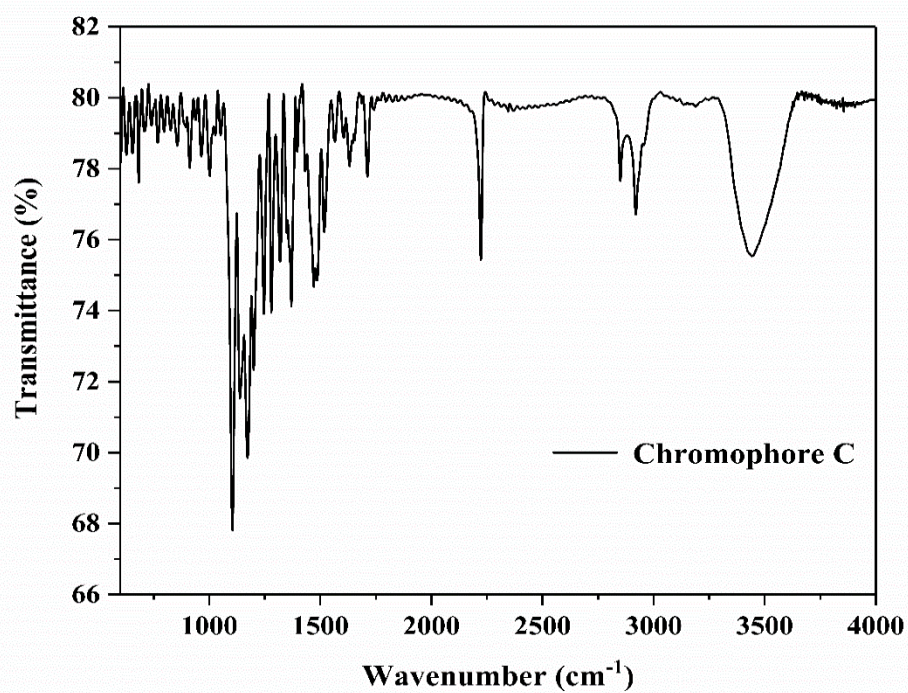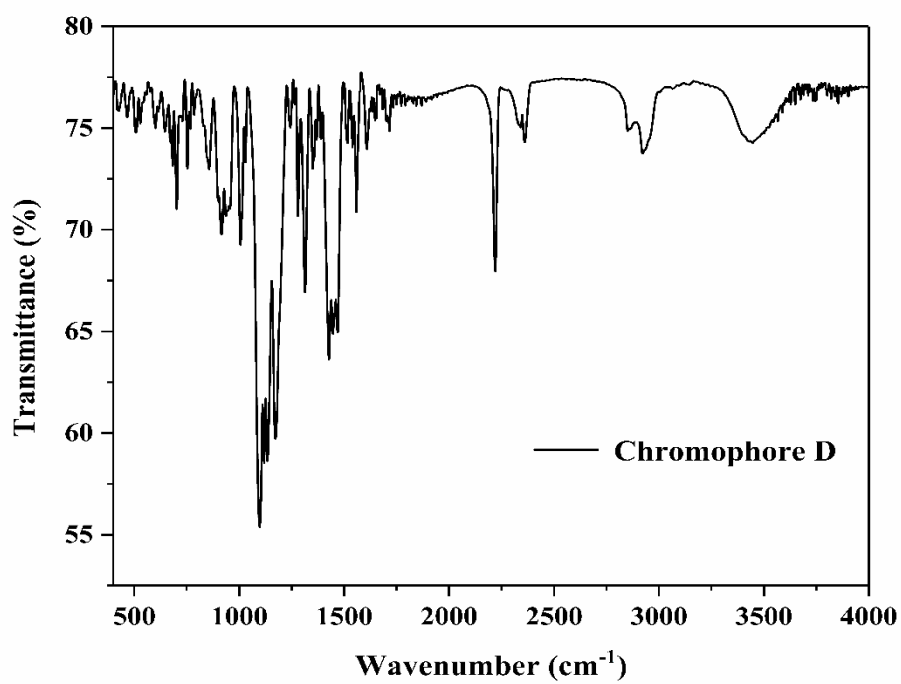

Figure S10. The FTIR spectra of the chromophore A, B, C and D.
